# Supplementary material for: Novel sulfonated poly(arylene ether sulfone) containing hydroxyl groups for enhanced proton exchange membrane properties
Source: Royal Society of Chemistry journal article supplement (doi:10.1039/c4py01218f), 2014-11-04
Supplement: c4py01218f1.pdf [file c4py01218f1.pdf]

Electronic Supplementary Information

Novel sulfonated poly(arylene ether sulfone) containing hydroxyl groups for enhanced proton exchange membrane properties

Yeonhye Kwon, So Young Lee, Sukjae Hong, Jong Hyun Jang, Dirk Henkensmeier, Sung Jong Yoo, Hyung-Juhn Kim\*, Sung-Hyun Kim\*\*

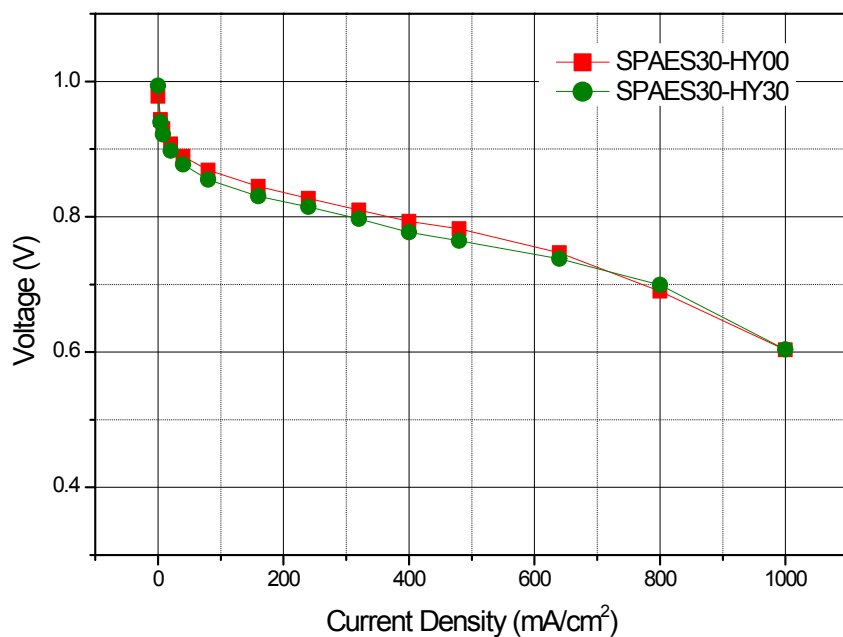

**Figure S1.** Polarization curves of SPAES30-HY00 and SPAES30-HY30, excluding the effect of ohmic resistance.
